# Supplementary material
Source: Springer Nature journal article supplement (https://www.springermedizin.de/resource/supplementary/12913_2011_2430_MOESM3_ESM.pdf/9530482)

|   | Population | Site                                | Provider   | Test             | Preference Rating |
|---|------------|-------------------------------------|------------|------------------|-------------------|
| * | 50 years   | Community<br>Optometric<br>Practice | Technician | FDT & HRT or GDx | 8                 |

This example means that you rate this combination as an 8 on a scale of 0-10, and would strongly consider this screening strategy in a RCT.

\* - indicates that this combination was suggested by more than one respondent in the first round of questionnaires.

Please now rate the following combinations on a scale from 0-10.

Should not be considered

Should be considered

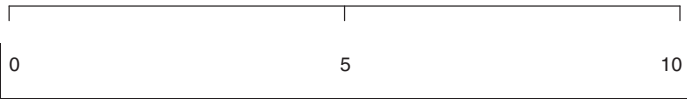

Supplement: MOESM3 [file 9530482]
